# Supplementary material for: Bacterial protein signals are associated with Crohn’s disease
Source: HighWire-hosted journal article supplement (doi:10.1136/gutjnl-2012-303786), 2014-01-16
Supplement: gutjnl-2012-303786supp_table1.pdf [file gutjnl-2012-303786supp_table1.pdf]

**Supplementary Table 1** Dye swap design of 2D-DIGE profiling

|         | <b>Cy2</b> | <b>Cy3</b> | <b>Cy5</b> |
|---------|------------|------------|------------|
| gel 01* | STANDARD   | HC.6       | CD.6       |
| gel 02* | STANDARD   | CD.3       | HC.3       |
| gel 03* | STANDARD   | HC.3       | CD.3       |
| gel 04  | STANDARD   | HC.5       | CD.5       |
| gel 05  | STANDARD   | HC.1       | CD.1       |
| gel 06  | STANDARD   | CD.6       | HC.6       |
| gel 07* | STANDARD   | HC.2       | CD.2       |
| gel 08* | STANDARD   | HC.4       | CD.4       |
| gel 09* | STANDARD   | CD.4       | HC.4       |
| gel 10* | STANDARD   | CD.1       | HC.1       |
| gel 11* | STANDARD   | CD.2       | HC.2       |
| gel 12* | STANDARD   | CD.5       | HC.5       |

\*Gels used for spot excision and protein identifications. Microbial fractions were extracted in duplicate for each participant, giving 24 protein samples in total, which were analyzed in a dye swap design. Typically, the two protein samples (50 µg each) from a given patient-control pair were differentially labeled with Cy3 or Cy5, respectively (for instance, HC.6-Cy3 and CD.6-Cy5, top row of the table) and their replicates were reversely labeled with Cy5 or Cy3 (HC.6-Cy5 and CD.6-Cy3, row 6 of the table). They were combined in pairs, and each pair was run in the same first- and second-dimension gel (gels 01 and 06 in the example), together with 50 µg of a Cy2-labeled internal standard made of a pool of equal protein amounts from each of the 24 samples included in the study. The 12 gels in total were scanned with a Typhoon imager 9410 (GE Healthcare) and the multiplexed DIGE images were analyzed using Progenesis SameSpots software (Nonlinear Dynamics) (online supplementary method 3).
