# Supplementary material for: Bacterial protein signals are associated with Crohn’s disease
Source: HighWire-hosted journal article supplement (doi:10.1136/gutjnl-2012-303786), 2014-01-16
Supplement: gutjnl-2012-303786supp_table2.pdf [file gutjnl-2012-303786supp_table2.pdf]

**Supplementary Table 2** Optimized scheduled SRM assay for the 13/46 targeted proteins/peptides. The protein accession number corresponds to the one extracted from the MetaHit Database. For each peptide, at least three transitions were monitored to identify the targeted peptides. The relative quantification was done on the best transitions(\*), i.e. with no interfering signals and having coefficients of variation lower than 20%. Collision energy was calculated using the following equation: CE=0.03 x (Precursor ion m/z) + 2.905. Transitions were monitored during a 7 minute window centered at the expected retention time and split into 2 acquisition methods (1) or (2).

| Protein Name                     | Protein Accession Number | Peptide Sequence (SRM Method number) | Light                  |                                                                                                 | Heavy                  |                                                                                                 | Collision Energy (V) | Retention Time (min) |
|----------------------------------|--------------------------|--------------------------------------|------------------------|-------------------------------------------------------------------------------------------------|------------------------|-------------------------------------------------------------------------------------------------|----------------------|----------------------|
|                                  |                          |                                      | Precursor m/z (charge) | Product m/z (Ion type, charge)                                                                  | Precursor m/z (charge) | Product m/z (Ion type, charge)                                                                  |                      |                      |
| AhpC COG0450 Bacteroides         | 215822                   | AWHDASESIR (1)                       | 586.278169 (2+)        | 662.34678 (y6, 1+)<br>777.373723 (y7, 1+)<br>914.432635 (y8, 1+)*                               | 591.282303 (2+)        | 672.355049 (y6, 1+)<br>787.381992 (y7, 1+)<br>924.440904 (y8, 1+)*                              | 20,5                 | 17,2                 |
|                                  |                          | GTFVFNPEGK (1)                       | 524.277106 (2+)        | 544.272552 (y5, 1+)*<br>643.340966 (y6, 1+)<br>742.40938 (y7, 1+)                               | 528.284206 (2+)        | 552.286751 (y5, 1+)*<br>651.355165 (y6, 1+)<br>750.423579 (y7, 1+)                              | 18,6                 | 22                   |
|                                  |                          | LAEIQDNSIGR (1)                      | 608.320033 (2+)        | 661.326378 (y6, 1+)<br>789.384956 (y7, 1+)<br>902.46902 (y8, 1+)*                               | 613.324168 (2+)        | 671.334647 (y6, 1+)<br>799.393225 (y7, 1+)<br>912.477289 (y8, 1+)*                              | 21,2                 | 20,8                 |
| ClpB COG0542 Bacteroides         | 1562586                  | VVGQDEAIAVSDAVR (1)                  | 800.420476 (2+)        | 972.54727 (y10, 1+)<br>911.518426 (y9, 1+)<br>788.426093 (y8, 1+)*                              | 805.42461 (2+)         | 982.555539 (y10, 1+)<br>901.510157 (y9, 1+)<br>798.434362 (y8, 1+)*                             | 26,9                 | 30,4                 |
|                                  |                          | YAINLINEAR (1)                       | 567.798737 (2+)        | 560.2787 (y5, 1+)<br>673.362764 (y6, 1+)*<br>787.405691 (y7, 1+)*                               | 572.802871 (2+)        | 570.286969 (y5, 1+)<br>683.371033 (y6, 1+)*<br>797.413396 (y7, 1+)*                             | 19,9                 | 24,7                 |
| DnaK COG0443 Bacteroides         | 1624002                  | GVPQIEVTFDIDANGILK (1)               | 965.020023 (2+)        | 1105.588801 (y10, 1+)*<br>1206.636479 (y11, 1+)<br>886.975084 (y16, 2+)*                        | 969.027122 (2+)        | 1113.603 (y10, 1+)*<br>1214.650678 (y11, 1+)<br>890.982183 (y16, 2+)*                           | 31,9                 | 42,3                 |
|                                  |                          | IVNEPTAAALAYLSDK (2)                 | 823.44342 (2+)         | 327.202681 (b3, 1+)<br>666.345717 (y6, 1+)*<br>850.466895 (y8, 1+)<br>921.504009 (y9, 1+)*      | 827.450519 (2+)        | 327.202681 (b3, 1+)<br>674.359916 (y6, 1+)*<br>858.481094 (y8, 1+)<br>929.518208 (y9, 1+)*      | 27,6                 | 32,1                 |
|                                  |                          | SIGQFNLTGIAPAR (1)                   | 722.898982 (2+)        | 1059.594555 (y10, 1+)*<br>685.399149 (y7, 1+)<br>912.526141 (y9, 1+)                            | 727.903117 (2+)        | 1069.602824 (y10, 1+)*<br>695.407418 (y7, 1+)<br>922.53441 (y9, 1+)                             | 24,6                 | 33,6                 |
| FusA COG0480 Bacteroides         | 724132                   | FASYELVPTDVQEK (2)                   | 813.406503 (2+)        | 816.409774 (y7, 1+)<br>915.478188 (y8, 1+)*<br>1028.562252 (y9, 1+)*                            | 817.413602 (2+)        | 824.423973 (y7, 1+)<br>923.492387 (y8, 1+)*<br>1036.576451 (y9, 1+)*                            | 27,3                 | 30                   |
|                                  |                          | GTEEIPLEWGGK (2)                     | 658.330067 (2+)        | 417.161605 (b4, 1+)<br>447.235044 (y4, 1+)*<br>786.414465 (y7, 1+)                              | 662.337166 (2+)        | 417.161605 (b4, 1+)<br>455.249243 (y4, 1+)*<br>794.428664 (y7, 1+)                              | 22,7                 | 31                   |
|                                  |                          | ILEPIYDEVFVPSDK (1)                  | 931.992942 (2+)        | 943.513511 (b8, 1+)*<br>1134.567731 (y10, 1+)*<br>1297.63106 (y11, 1+)*<br>920.472374 (y8, 1+)* | 936.000042 (2+)        | 943.513511 (b8, 1+)*<br>1142.58193 (y10, 1+)*<br>1305.645259 (y11, 1+)*<br>928.486573 (y8, 1+)* | 30,9                 | 41,9                 |
|                                  |                          | NIALLGNDGSGK (1)                     | 579.809302 (2+)        | 931.484336 (y10, 1+)*<br>634.279094 (y7, 1+)*<br>747.363158 (y8, 1+)*                           | 583.816401 (2+)        | 939.498535 (y10, 1+)*<br>642.293293 (y7, 1+)*<br>755.377357 (y8, 1+)*                           | 20,3                 | 25,3                 |
|                                  |                          | VHEGDLLTNADR (2)                     | 671.305112 (2+)        | 237.134602 (b2, 1+)<br>1105.475622 (y10, 1+)*<br>689.357679 (y6, 1+)<br>976.433028 (y9, 1+)*    | 676.309246 (2+)        | 237.134602 (b2, 1+)<br>1115.483891 (y10, 1+)*<br>699.365948 (y6, 1+)<br>986.441297 (y9, 1+)*    | 23                   | 13,4                 |
| GapA COG0057 Prevotella          | 2596432                  | GILGYTEDK (1)                        | 498.255839 (2+)        | 655.293347 (y5, 1+)<br>712.314811 (y6, 1+)<br>825.398875 (y7, 1+)*                              | 502.262939 (2+)        | 663.307546 (y5, 1+)<br>720.32901 (y6, 1+)<br>833.413074 (y7, 1+)*                               | 17,9                 | 23,2                 |
|                                  |                          | VPTLDVSVVLTNLK (1)                   | 856.495652 (2+)        | 1087.635751 (y10, 1+)*<br>901.535309 (y8, 1+)*<br>1000.603723 (y9, 1+)*                         | 860.502752 (2+)        | 1095.64995 (y10, 1+)*<br>909.549508 (y8, 1+)*<br>1008.617922 (y9, 1+)*                          | 28,6                 | 42,2                 |
|                                  |                          | VVSWYDNEIGVSHK (1)                   | 848.901919 (2+)        | 1225.548393 (y10, 1+)<br>371.203744 (y3, 1+)<br>591.288536 (y5, 1+)*                            | 852.909018 (2+)        | 1233.562592 (y10, 1+)<br>379.217943 (y3, 1+)<br>599.302735 (y5, 1+)*                            | 28,4                 | 27,8                 |
| GP2 Homo sapiens                 | sp P55259                | C[+57]LLGGLGLGEEVIAYLR (2)           | 917.000579 (2+)        | 1162.64665 (y10, 1+)<br>992.541122 (y8, 1+)<br>1049.562586 (y9, 1+)*                            | 922.004713 (2+)        | 1172.654919 (y10, 1+)<br>1002.549391 (y8, 1+)<br>1059.570855 (y9, 1+)*                          | 30,4                 | 49,6                 |
|                                  |                          | LEGTPWC[+57]NLR (2)                  | 623.305872 (2+)        | 748.355905 (y5, 1+)<br>845.408669 (y6, 1+)*<br>1003.477811 (y8, 1+)*                            | 628.310006 (2+)        | 758.364174 (y5, 1+)<br>855.416938 (y6, 1+)*<br>1013.48608 (y8, 1+)*                             | 21,6                 | 29                   |
|                                  |                          | NTLSLVNDFIIR (2)                     | 702.895908 (2+)        | 777.425364 (y6, 1+)*<br>876.493778 (y7, 1+)*<br>989.577842 (y8, 1+)*                            | 707.900043 (2+)        | 787.433633 (y6, 1+)*<br>886.502047 (y7, 1+)*<br>999.586111 (y8, 1+)*                            | 24                   | 41,8                 |
|                                  |                          | NWVSVTSPVQASAC[+57]R (1)             | 831.406846 (2+)        | 1076.515319 (y10, 1+)*<br>1262.615761 (y12, 1+)*<br>975.46764 (y9, 1+)*                         | 836.41098 (2+)         | 1086.523588 (y10, 1+)*<br>1272.62403 (y12, 1+)*<br>985.475909 (y9, 1+)*                         | 27,8                 | 27,9                 |
| KorA COG0674,COG1014 Bacteroides | 707721                   | GQPFVSELVDAFTEILNK (1)               | 1053.559512 (2+)       | 1149.615016 (y10, 1+)*<br>1262.69908 (y11, 1+)<br>961.019491 (y17, 2+)*                         | 1057.566612 (2+)       | 1157.629215 (y10, 1+)*<br>1270.713279 (y11, 1+)<br>965.026591 (y17, 2+)*                        | 34,5                 | 50,3                 |
|                                  |                          | LFSGSYPTPATDILHELSK (1)              | 1108.104087 (2+)       | 1223.663028 (y11, 1+)*<br>1324.710707 (y12, 1+)<br>767.927405 (y14, 2+)                         | 1112.111186 (2+)       | 1231.677227 (y11, 1+)*<br>1332.724906 (y12, 1+)<br>771.934505 (y14, 2+)                         | 36,1                 | 46,1                 |
| PepD COG2195 Bacteroides         | 377760                   | GGHSGLEINEGR (2)                     | 613.299632 (2+)        | 588.31 (y5, 1+)<br>887.458121 (y8, 1+)*<br>974.490149 (y9, 1+)                                  | 618.303767 (2+)        | 598.318269 (y5, 1+)<br>897.46639 (y8, 1+)*<br>984.498418 (y9, 1+)                               | 21,3                 | 16,5                 |
|                                  |                          | SGGYSGWEPNVDSPIPK (2)                | 903.438866 (2+)        | 1111.599366 (y10, 1+)*<br>470.333696 (y4, 1+)<br>982.556772 (y9, 1+)*                           | 907.445965 (2+)        | 1119.613565 (y10, 1+)*<br>478.347895 (y4, 1+)<br>990.570971 (y9, 1+)*                           | 30                   | 33,2                 |
|                                  |                          | SVGVESFQDEAGNIYR (2)                 | 942.460329 (2+)        | 1178.580027 (y10, 1+)*<br>806.451913 (y7, 1+)*<br>1050.52145 (y9, 1+)*                          | 947.464464 (2+)        | 1188.588296 (y10, 1+)*<br>816.460182 (y7, 1+)*<br>1060.529719 (y9, 1+)*                         | 31,2                 | 33,4                 |
| Pfk COG0205 Bacteroides          | 182951                   | ENSEIYASLPEGVAR (1)                  | 817.904659 (2+)        | 1062.557835 (y10, 1+)*<br>628.3413 (y6, 1+)<br>828.457393 (y8, 1+)*                             | 822.908793 (2+)        | 1072.566104 (y10, 1+)*<br>638.349569 (y6, 1+)<br>838.465662 (y8, 1+)*                           | 27,4                 | 28,3                 |
|                                  |                          | NTGGFDIIGSGR (1)                     | 597.299101 (2+)        | 978.50032 (y10, 1+)*<br>489.277972 (y5, 1+)*<br>602.362036 (y6, 1+)*                            | 602.303236 (2+)        | 988.508589 (y10, 1+)*<br>499.286241 (y5, 1+)*<br>612.370305 (y6, 1+)*                           | 20,8                 | 27,7                 |
|                                  |                          | TYSEVIGNIQR (2)                      | 640.335684 (2+)        | 587.325985 (y5, 1+)*<br>700.410049 (y6, 1+)*<br>1015.553084 (y9, 1+)                            | 645.339818 (2+)        | 597.334254 (y5, 1+)*<br>710.418318 (y6, 1+)*<br>1025.561353 (y9, 1+)                            | 22,1                 | 24,6                 |

|                                   |         |                       |                 |                                                                                              |                 |                                                                                             |      |      |
|-----------------------------------|---------|-----------------------|-----------------|----------------------------------------------------------------------------------------------|-----------------|---------------------------------------------------------------------------------------------|------|------|
| surface   Bacteroidales           | 1939312 | ADQATVTALEAR (1)      | 623.325316 (2+) | 660.367515 (y6, 1+)<br>759.435929 (y7, 1+)*<br>860.483607 (y8, 1+)                           | 628.32945 (2+)  | 670.375784 (y6, 1+)<br>769.444198 (y7, 1+)*<br>870.491876 (y8, 1+)                          | 21,6 | 21,3 |
|                                   |         | DNTTDDIYSENSR (2)     | 758.331523 (2+) | 592.268529 (y5, 1+)<br>755.331858 (y6, 1+)*<br>1084.490543 (y9, 1+)*                         | 763.335658 (2+) | 602.276798 (y5, 1+)<br>765.340127 (y6, 1+)*<br>1094.498812 (y9, 1+)*                        | 25,7 | 17,2 |
|                                   |         | EDAWNLINPLAQADEK (2)  | 913.949597 (2+) | 1098.578964 (y10, 1+)*<br>871.451973 (y8, 1+)<br>985.4949 (y9, 1+)*                          | 917.956697 (2+) | 1106.593163 (y10, 1+)*<br>879.466172 (y8, 1+)<br>993.509099 (y9, 1+)*                       | 30,3 | 39,5 |
|                                   |         | VEALESIDIATIR (2)     | 750.917038 (2+) | 1088.594615 (y10, 1+)*<br>759.435929 (y7, 1+)*<br>959.552021 (y9, 1+)*                       | 755.921172 (2+) | 1098.602884 (y10, 1+)*<br>769.444198 (y7, 1+)*<br>969.56029 (y9, 1+)*                       | 25,4 | 36,4 |
|                                   |         | VQAEGLDQATFEK (1)     | 718.356813 (2+) | 1137.542245 (y10, 1+)*<br>1208.579358 (y11, 1+)*<br>1008.499651 (y9, 1+)                     | 722.363912 (2+) | 1145.556444 (y10, 1+)*<br>1216.593557 (y11, 1+)*<br>1016.51385 (y9, 1+)                     | 24,5 | 23,6 |
|                                   |         | YDVC[+57]LIAPIR (1)   | 610.328816 (2+) | 569.376957 (y5, 1+)*<br>682.461021 (y6, 1+)*<br>842.49167 (y7, 1+)*                          | 615.33295 (2+)  | 579.385226 (y5, 1+)*<br>692.46929 (y6, 1+)*<br>852.499939 (y7, 1+)*                         | 21,2 | 33,6 |
| TktA-TktB   COG0021   Bacteroides | 513615  | LAMENTSTPTALIFSR (1)  | 876.453461 (2+) | 1092.604785 (y10, 1+)*<br>904.525078 (y8, 1+)*<br>1005.572757 (y9, 1+)                       | 881.457596 (2+) | 1102.613054 (y10, 1+)*<br>914.533347 (y8, 1+)*<br>1015.581026 (y9, 1+)                      | 29,2 | 35,6 |
|                                   |         | LGFTAQNVYVYQVK (1)    | 741.39099 (2+)  | 488.282723 (y4, 1+)<br>651.346051 (y5, 1+)*<br>864.457393 (y7, 1+)*                          | 745.39809 (2+)  | 496.296922 (y4, 1+)<br>659.36025 (y5, 1+)*<br>872.471592 (y7, 1+)*                          | 25,1 | 28,9 |
|                                   |         | NLGGDPTNPFQIFPEVK (1) | 936.978158 (2+) | 472.276575 (y4, 1+)*<br>619.344989 (y5, 1+)*<br>1104.608808 (y9, 1+)                         | 940.985257 (2+) | 480.290774 (y4, 1+)*<br>627.359188 (y5, 1+)*<br>1112.623007 (y9, 1+)                        | 31   | 40,7 |
|                                   |         | VITIDGNPDPAIR (2)     | 699.864805 (2+) | 571.319837 (y5, 1+)<br>857.411171 (y8, 1+)*<br>972.438114 (y9, 1+)                           | 704.86894 (2+)  | 581.328106 (y5, 1+)<br>867.41944 (y8, 1+)*<br>982.446383 (y9, 1+)                           | 23,9 | 25,4 |
| TonB   Bacteroides                | 1861838 | ASFTGAAAIIGEDVIAK (1) | 817.44342 (2+)  | 1028.598637 (y10, 1+)<br>731.393395 (y7, 1+)*<br>844.477459 (y8, 1+)*                        | 821.450519 (2+) | 1036.612836 (y10, 1+)<br>739.407594 (y7, 1+)*<br>852.491658 (y8, 1+)*                       | 27,4 | 37,1 |
|                                   |         | DGSSVFGSNHR (1)       | 581.765425 (2+) | 570.274283 (y5, 1+)<br>717.342697 (y6, 1+)*<br>816.411111 (y7, 1+)                           | 586.76956 (2+)  | 580.282552 (y5, 1+)<br>727.350966 (y6, 1+)*<br>826.41938 (y7, 1+)                           | 20,4 | 14,9 |
|                                   |         | YPQYIYGDPNK (2)       | 679.324785 (2+) | 358.208495 (y3, 1+)<br>693.32023 (y6, 1+)*<br>969.467623 (y8, 1+)                            | 683.331884 (2+) | 366.222694 (y3, 1+)<br>701.334429 (y6, 1+)*<br>977.481822 (y8, 1+)                          | 23,3 | 23,5 |
| type 1 dockerin   Ruminococcus    | 1622487 | DVEVYIVGTGNYSGR (1)   | 814.899376 (2+) | 1023.521784 (y10, 1+)*<br>1186.585112 (y11, 1+)*<br>910.43772 (y9, 1+)*                      | 819.903511 (2+) | 1033.530053 (y10, 1+)*<br>1196.593381 (y11, 1+)*<br>920.445989 (y9, 1+)*                    | 27,4 | 29,5 |
|                                   |         | FVSGTTNVNLSTSDYK (1)  | 866.923048 (2+) | 613.282782 (y5, 1+)<br>700.314811 (y6, 1+)*<br>927.441802 (y8, 1+)*                          | 870.930148 (2+) | 621.296981 (y5, 1+)<br>708.32901 (y6, 1+)*<br>935.456001 (y8, 1+)*                          | 28,9 | 24,4 |
|                                   |         | NAGEATVTVGVK (1)      | 573.311677 (2+) | 960.536037 (y10, 1+)*<br>703.434866 (y7, 1+)<br>774.47198 (y8, 1+)                           | 577.318777 (2+) | 968.550236 (y10, 1+)*<br>711.449065 (y7, 1+)<br>782.486179 (y8, 1+)                         | 20,1 | 17,8 |
|                                   |         | VNVVVGDATVTLAPVK (2)  | 798.951412 (2+) | 214.118617 (b2, 1+)<br>1071.604451 (y11, 1+)*<br>343.233982 (y3, 1+)<br>414.271095 (y4, 1+)* | 802.958511 (2+) | 214.118617 (b2, 1+)<br>1079.61865 (y11, 1+)*<br>351.248181 (y3, 1+)<br>422.285294 (y4, 1+)* | 26,9 | 31   |
|                                   |         | YFNNITGPK (2)         | 527.271824 (2+) | 629.361701 (y6, 1+)<br>743.404629 (y7, 1+)<br>890.473043 (y8, 1+)*                           | 531.278923 (2+) | 637.3759 (y6, 1+)<br>751.418828 (y7, 1+)<br>898.487242 (y8, 1+)*                            | 18,7 | 22,5 |
